# Supplementary material for: Temperature dependent molecular fluorescence of [Agm]n+ quantum clusters stabilized by phosphate glass networks
Source: Royal Society of Chemistry journal article supplement (doi:10.1039/d0cp03828h), 2020-01-01
Supplement: d0cp03828h1.pdf [file d0cp03828h1.pdf]

## Supporting Information

### **Temperature dependent molecular fluorescence of $[Ag_m]^{n+}$ quantum clusters stabilized by phosphate glass networks**

Kai Ren,<sup>a</sup> Xiuxia Xu,<sup>a</sup> Zeyu Yao,<sup>a</sup> Xiaotong Chen,<sup>a</sup> Tian Hu,<sup>a</sup> Pengcheng Li,<sup>a</sup>

Xianping Fan,<sup>a,\*</sup> Jincheng Du,<sup>b</sup> Xvsheng Qiao<sup>a,\*</sup> and Guodong Qian<sup>a</sup>

<sup>a</sup> *State Key Laboratory of Silicon Materials & School of Materials Science and  
Engineering, Zhejiang University, Hangzhou 310027, China*

<sup>b</sup> *Department of Materials Science and Engineering, University of North Texas,  
Denton, Texas 76203-5017, U.S.*

**\*Corresponding Author.** Dr. Xvsheng Qiao: E-mail: qiaoxus@zju.edu.cn; Tel.: +86-571-87951234. Dr. Xianping Fan: E-mail: fanxp@zju.edu.cn; Tel.: +86-571-87951234.

### Mass spectra analysis details:

We firstly get the mass spectra of silver doped/undoped glass samples, H<sub>2</sub>O and dilute hydrochloric acid. Then, compared with H<sub>2</sub>O and dilute hydrochloric acid, the characteristic peaks of the silver doped glass samples were identified as two groups of peaks ( $m/z = -354; -355; -356; -357; -358; -359$  and  $m/z = -439; -440; -441; -442; -443; -444$ ) with almost fixed  $\Delta m/z=1$  between adjacent peaks. The  $m/z=1$  gap among the mass spectra peaks are generated from isotopes of Ag and Zn with  $\Delta m = 2$  (Table S3, S4). Accordingly, the molecular fragments charge was evaluated as -2. Subsequently, to further determine the fluorophosphate coordinated molecule fragment, we compiled a small program to compute all possible  $[n\text{Ag}^+(m-n)\text{Ag}^0][\text{P}_x\text{Zn}_y\text{O}_z\text{F}_w] \cdot a\text{H}^+ \cdot b\text{OH} \cdot c\text{H}_2\text{O}$  configuration with  $n = (0\sim 10)$ ,  $m = (1\sim 20)$ ,  $x = (2\sim 32)$ ,  $y = (0\sim 10)$ ,  $z = (6\sim 160)$ ,  $w = (0\sim 20)$ ,  $a = (1\sim 50)$ ,  $b = (1\sim 50)$ ,  $c = (1\sim 20)$ . We started the program to match the strongest peaks ( $m/z = -356$  and  $m/z = -442$ ) by using the most abundant isotope (<sup>107</sup>Ag; <sup>64</sup>Zn), after that we can extend the program selected  $[n\text{Ag}^+(m-n)\text{Ag}^0][\text{P}_x\text{Zn}_y\text{O}_z\text{F}_w] \cdot a\text{H}^+ \cdot b\text{OH} \cdot c\text{H}_2\text{O}$  configurations to all the other mass-to-charge ratio of the characteristic peaks within the same  $m/z$  group. To a further step, according to phosphate glass structure that  $[\text{P}(\text{O}, \text{F})_4]$  connect into chain structure and  $[\text{ZnO}_4]$  tetrahedral units in the investigated  $\text{P}_2\text{O}_5\text{-ZnF}_2\text{-Ag}$  glass, we excluded unreasonable configurations, such as:

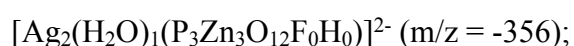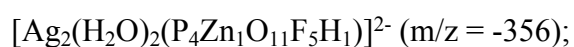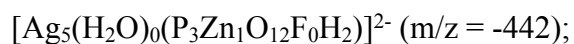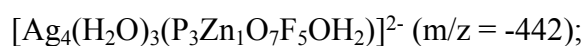

.....

Finally,  $[\text{Ag}_2(\text{H}_2\text{O})_2(\text{P}_4\text{Zn}_1\text{O}_{11}\text{F}_5\text{H}_1)]^{2-}$  ( $m/z = -356$ ) and  $[\text{Ag}_4(\text{H}_2\text{O})_3(\text{P}_4\text{O}_{11}\text{F}_5\text{H}_3)]^{2-}$  ( $m/z = -442$ ), as shown in Figure 4c-d, were finally worked out as the highly possible molecular fragments containing  $[\text{Ag}_2]^{2+}$  and  $[\text{Ag}_4]^{2+}$  configurations, respectively.

**Table S1** Glass transition ( $T_g$ ), crystallization peak ( $T_c$ ), melting temperature ( $T_m$ ) and

glass stability ( $\Delta T$ ) for different glass formulations.

| Glass                                                                 | $T_g$ (°C) | $T_c$ (°C) | $T_m$ (°C) | $\Delta T=(T_g-T_c)$ °C |
|-----------------------------------------------------------------------|------------|------------|------------|-------------------------|
| P0Ag                                                                  | 464        | 615        | 765        | 151                     |
| P0.4Ag                                                                | 478        | 609        | 762        | 131                     |
| P0.8Ag                                                                | 465        | 602        | 758        | 137                     |
| P1.2Ag                                                                | 450        | 598        | 752        | 148                     |
| P1.6Ag                                                                | 452        | 596        | 743        | 144                     |
| P2Ag                                                                  | 443        | 591        | 761        | 148                     |
| P <sub>2</sub> O <sub>5</sub> -MgO-CaO-Na <sub>2</sub> O <sup>1</sup> | 448        | 554        | 764        | 106                     |

1. M. T. Islam, N. Sharmin, G. A. Rance, J. J. Titman and I. Ahmed, *Journal of Biomedical Materials Research Part B Applied Biomaterials*, 2019.

**Table S2** The proportion of Q<sup>2</sup> tetrahedra and Q<sup>1</sup> tetrahedra of <sup>31</sup>P NMR spectra (Figure

1c) calculated by 2-Gaussian fit curves.

| Name               | P0.4Ag | P0.8Ag | P1.2Ag | P1.6Ag | P2Ag |
|--------------------|--------|--------|--------|--------|------|
| Q <sup>1</sup> (%) | 40.7   | 38.2   | 39.2   | 39.0   | 38.4 |
| Q <sup>2</sup> (%) | 59.3   | 61.8   | 60.8   | 61.0   | 61.6 |

**Table S3** Isotopes of zinc and their proportion.

| Zn         | <sup>64</sup> Zn | <sup>66</sup> Zn | <sup>67</sup> Zn | <sup>68</sup> Zn |
|------------|------------------|------------------|------------------|------------------|
| Proportion | 48.6%            | 27.9%            | 4.1%             | 18.8%            |

**Table S4** Isotopes of silver and their proportion.

| Ag         | <sup>107</sup> Ag | <sup>109</sup> Ag |
|------------|-------------------|-------------------|
| Proportion | 51.8%             | 48.2%             |

**Table S5** The lifetimes ( $\tau$ ) and the standard deviation ( $\sigma$ ) of  $[\text{Ag}_4]^{2+}$  QCs ( $\lambda_{\text{ex}} = 375$ )

nm,  $\lambda_{em} = 390$  nm) in P1.6Ag from 78K to 450K.

| Temperature/K | Lifetime/ns |
|---------------|-------------|
| 78            | 4.057±0.008 |
| 90            | 4.145±0.016 |
| 105           | 4.055±0.010 |
| 120           | 4.052±0.014 |
| 135           | 4.081±0.011 |
| 150           | 4.003±0.017 |
| 165           | 3.936±0.007 |
| 180           | 4.000±0.008 |
| 195           | 3.964±0.012 |
| 210           | 3.785±0.004 |
| 225           | 3.774±0.008 |
| 240           | 3.879±0.012 |
| 255           | 3.861±0.002 |
| 270           | 3.858±0.010 |
| 285           | 3.886±0.007 |
| 300           | 3.685±0.008 |
| 315           | 3.710±0.009 |
| 330           | 3.676±0.020 |
| 345           | 3.634±0.002 |
| 360           | 3.670±0.006 |
| 375           | 3.541±0.008 |
| 390           | 3.486±0.004 |
| 405           | 3.277±0.003 |
| 420           | 3.057±0.011 |
| 435           | 2.936±0.004 |
| 450           | 2.816±0.009 |

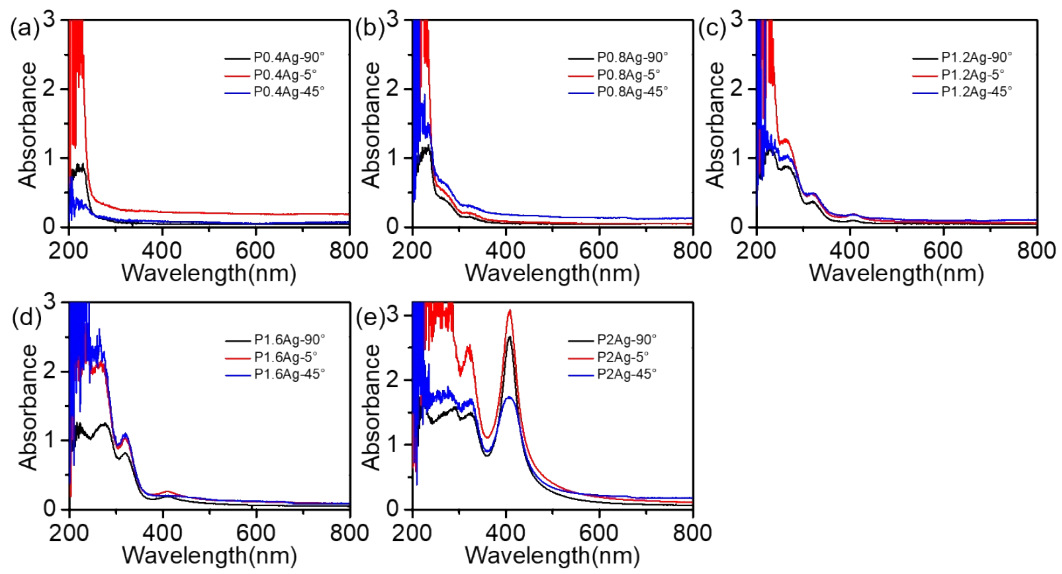

**Figure S1** Absorption spectra of 60PO<sub>2.5</sub>-40ZnF<sub>2-x</sub>Ag glasses measured with different light incident angles (90°, 45°, 5°): (a)P0.4Ag; (b)P0.8Ag; (c)P1.2Ag; (d)P1.6Ag; (e)P2Ag.



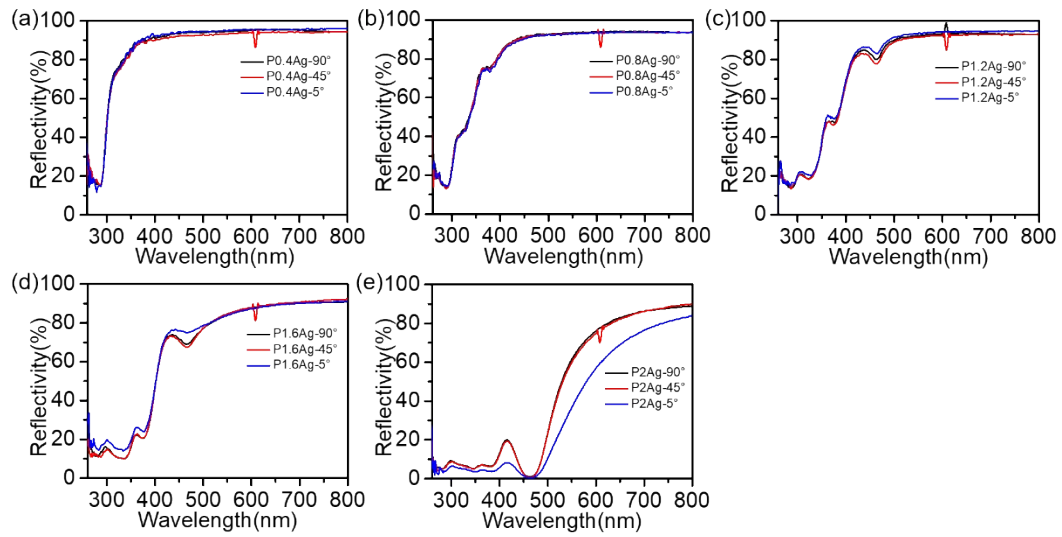

**Figure S2** Reflection spectra of 60PO<sub>2.5</sub>-40ZnF<sub>2</sub>-xAg glasses measured with different light incident angles (90°, 45°, 5°): (a)P0.4Ag; (b)P0.8Ag; (c)P1.2Ag; (d)P1.6Ag; (e)P2Ag.

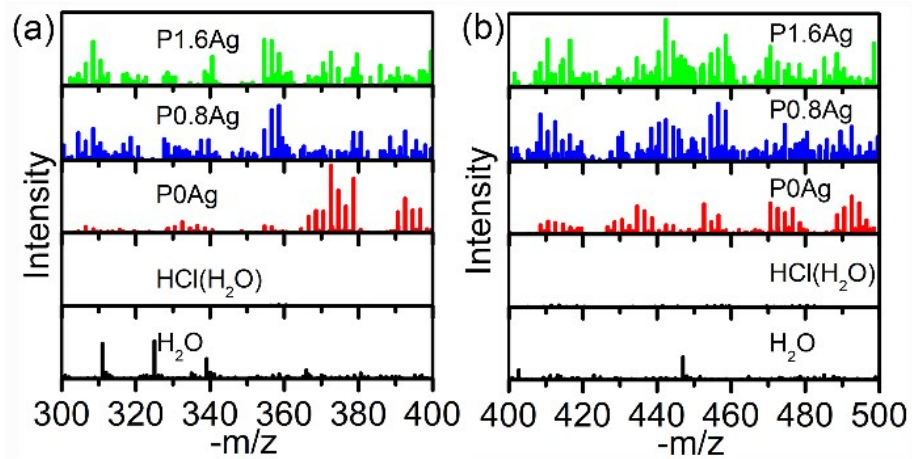

**Figure S3** Mass spectrum of  $P_xAg$  ( $x = 0, 0.8, 1.6$ ) and  $H_2O$ ,  $HCl(H_2O)$ : (a)  $m/z$  range:  $-300 \sim -400$ , (b)  $m/z$  range:  $-400 \sim -500$ .

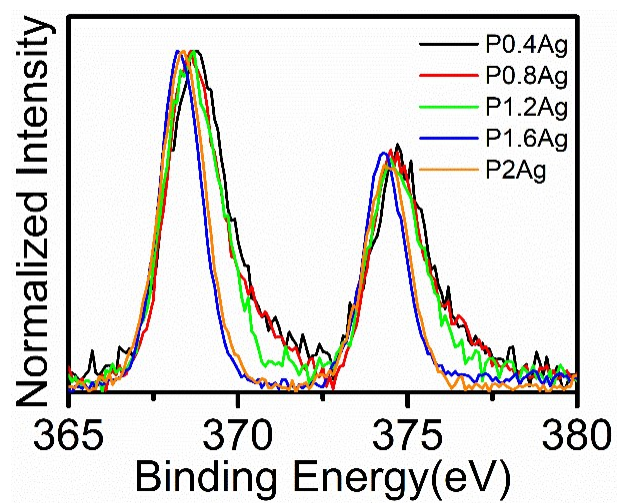

**Figure S4** Ag 3d<sub>5/2</sub> X-ray photoelectron spectra (XPS) spectra of P<sub>2</sub>O<sub>5</sub>-ZnF<sub>2</sub>-xAg glasses.

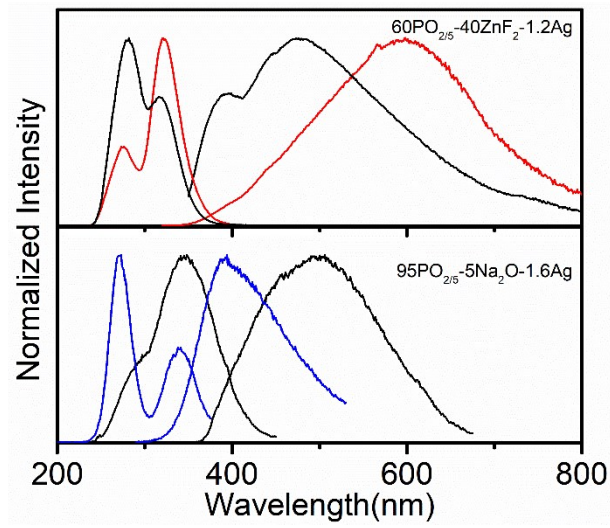

**Figure S5** Normalized fluorescence spectra of different silver species in  $95\text{PO}_{2/5}-5\text{Na}_2\text{O}-1.6\text{Ag}$  glass and  $60\text{PO}_{2/5}-40\text{ZnF}_2-1.2\text{Ag}$  glass.

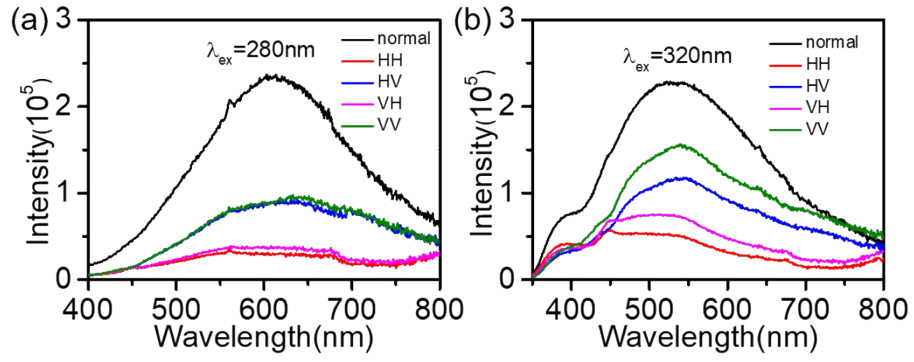

**Figure S6** Polarized spectra of 60PO<sub>2/5</sub>-40ZnF<sub>2</sub>-1.6Ag glasses: (a)  $\lambda_{\text{ex}} = 280\text{nm}$ ; (b)  $\lambda_{\text{ex}} = 320\text{nm}$ .

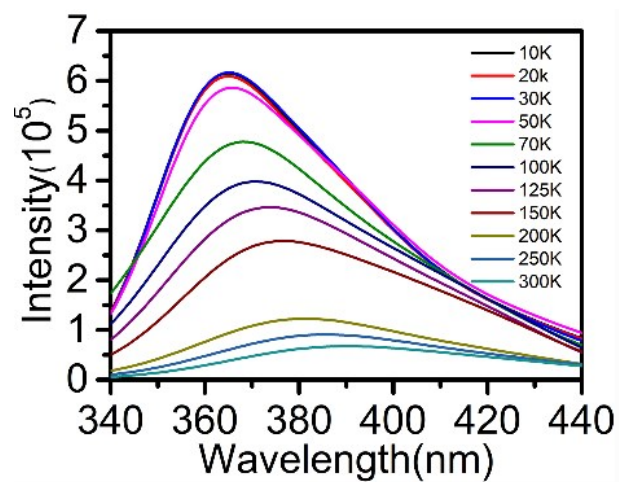

**Figure S7** The fitted  $S_1 \rightarrow S_0$  emission by a Gaussian multi-peak decomposition method from the total emission excited at 320nm of  $[Ag_4]^{2+}$  QCs in P1.6Ag from 10K to 300K.
